# Supplementary material
Source: Springer Nature journal article supplement (https://www.springermedizin.de/resource/supplementary/12985_2010_1117_MOESM2_ESM.pdf/9609178)

**A**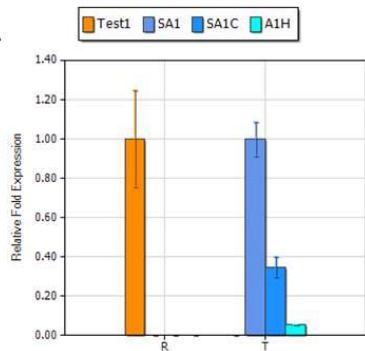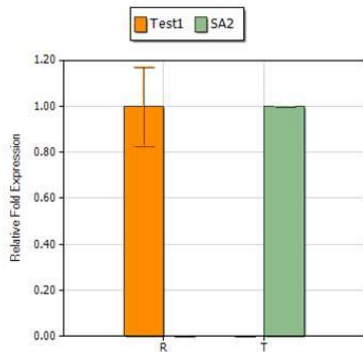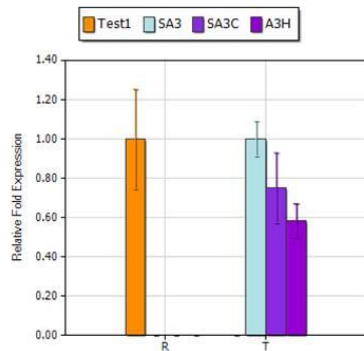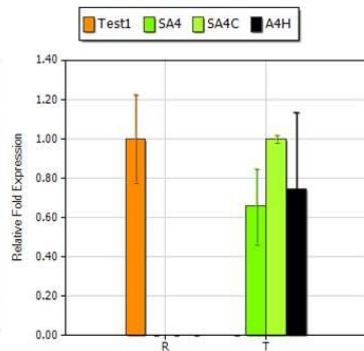**B**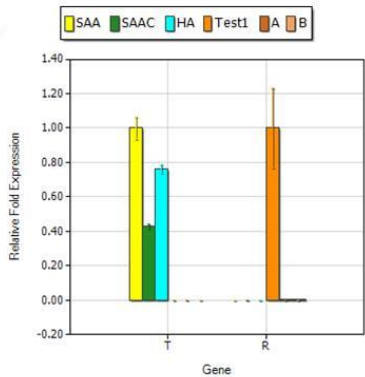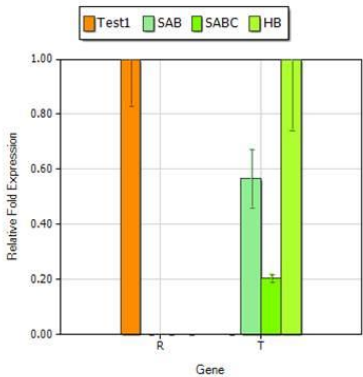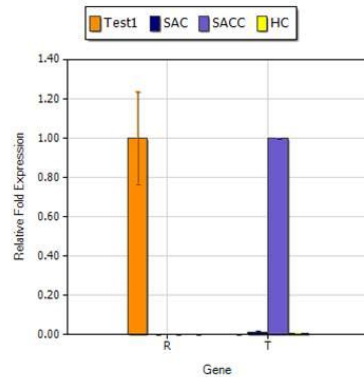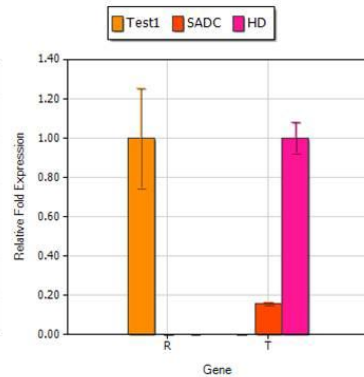

Supplement: MOESM2 [file 9609178]
